# Supplementary material for: Localized surface plasmon-enhanced nanosensor platform using dual-responsive polymer nanocomposites
Source: Royal Society of Chemistry journal article supplement (doi:10.1039/c3nr01453c), 2013-01-01
Supplement: c3nr01453c.pdf [file c3nr01453c.pdf]

# Electronic Supplementary Information

## Localized Surface Plasmon-Enhanced Nanosensor Platform using Dual-Responsive Polymer Nanocomposites

**Jaesuk Choi<sup>a</sup>, Min-Jae Choi<sup>a</sup>, Jung-Keun Yoo<sup>a</sup>, Woon Ik Park<sup>a</sup>, Ju Ho Lee<sup>a</sup>, Jeong Yong  
Lee<sup>a,b</sup>, and Yeon Sik Jung<sup>a,\*</sup>**

<sup>a</sup> Department of Materials Science and Engineering, Korea Advanced Institute of Science and  
Technology (KAIST), 291 Daehak-ro, Yuseong-gu, Daejeon 305-701, Republic of Korea

<sup>b</sup> Center for Nanomaterials and Chemical Reactions, IBS, 291 Daehak-ro, Yuseong-gu, Daejeon  
305-701, Republic of Korea

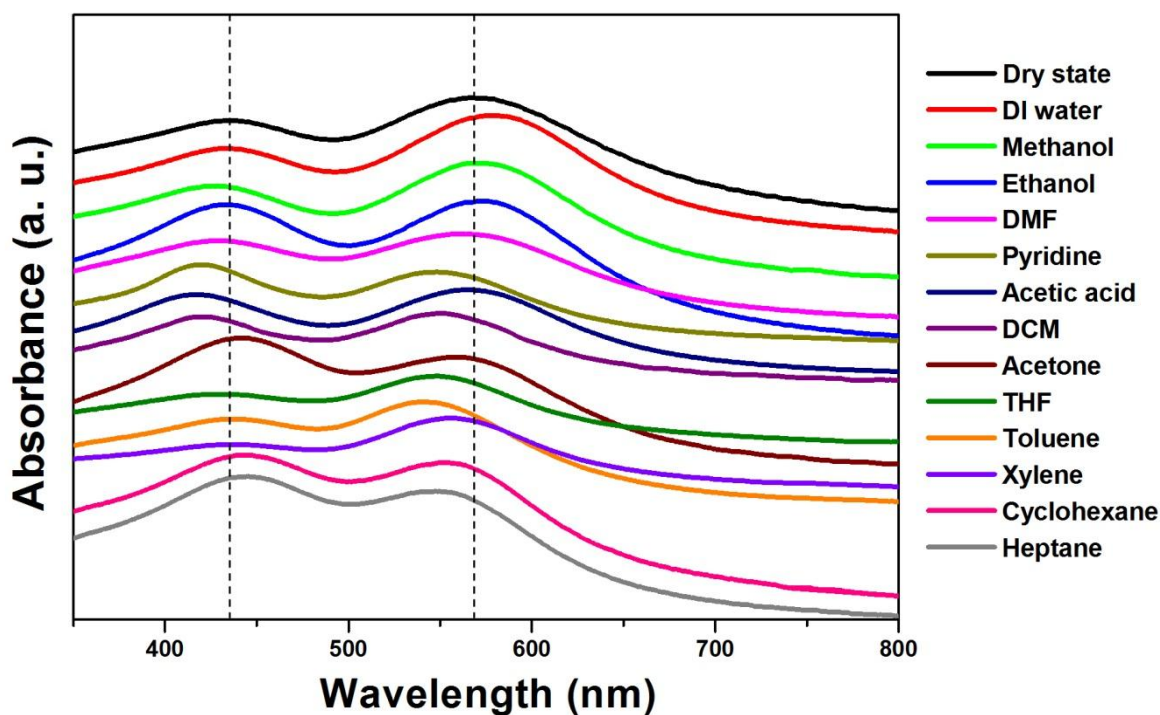

**Figure S1.** UV-Vis spectra of the dual-responsive nanocomposites under various types of surrounding media. Their background levels were adjusted in order to separate the spectra for easier comparison. The dotted lines indicate the peak positions ( $\lambda_1^{\text{peak}}$  and  $\lambda_2^{\text{peak}}$ ) of dry state.

(a)

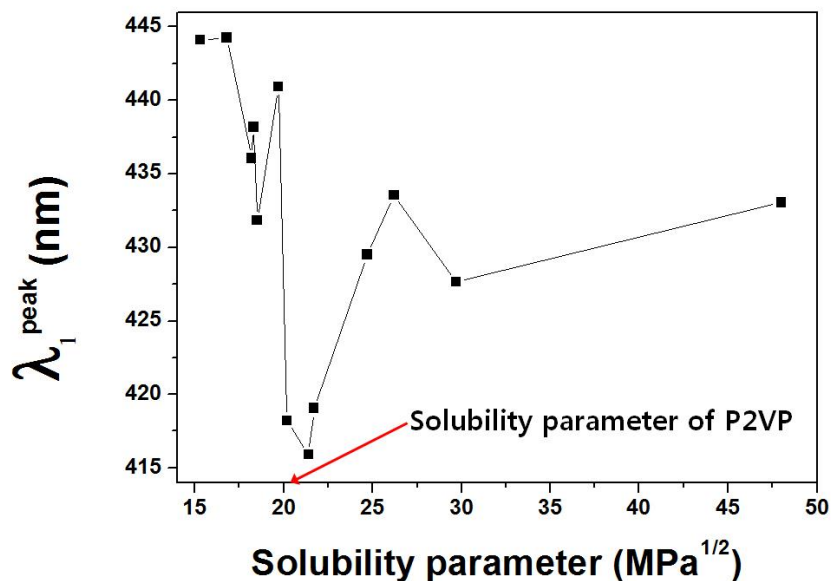

(b)

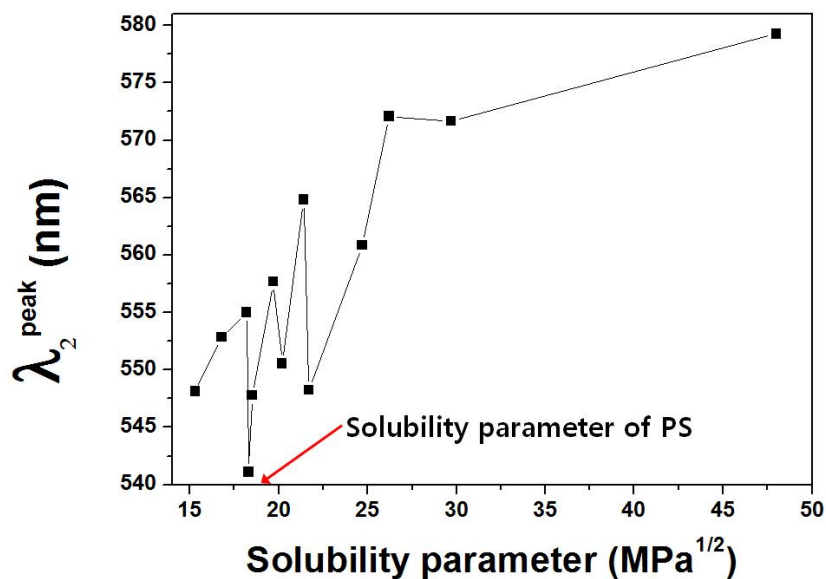

**Figure S2.** (a) – (b) The positions of the absorption peaks as a function of the solubility parameter ( $\delta$ ). (a) P2VP/AgNP and (b) PS/AuNP. The peak wavelengths reach a minimum when the solubility parameters of the polymer brush and liquid are best matched.

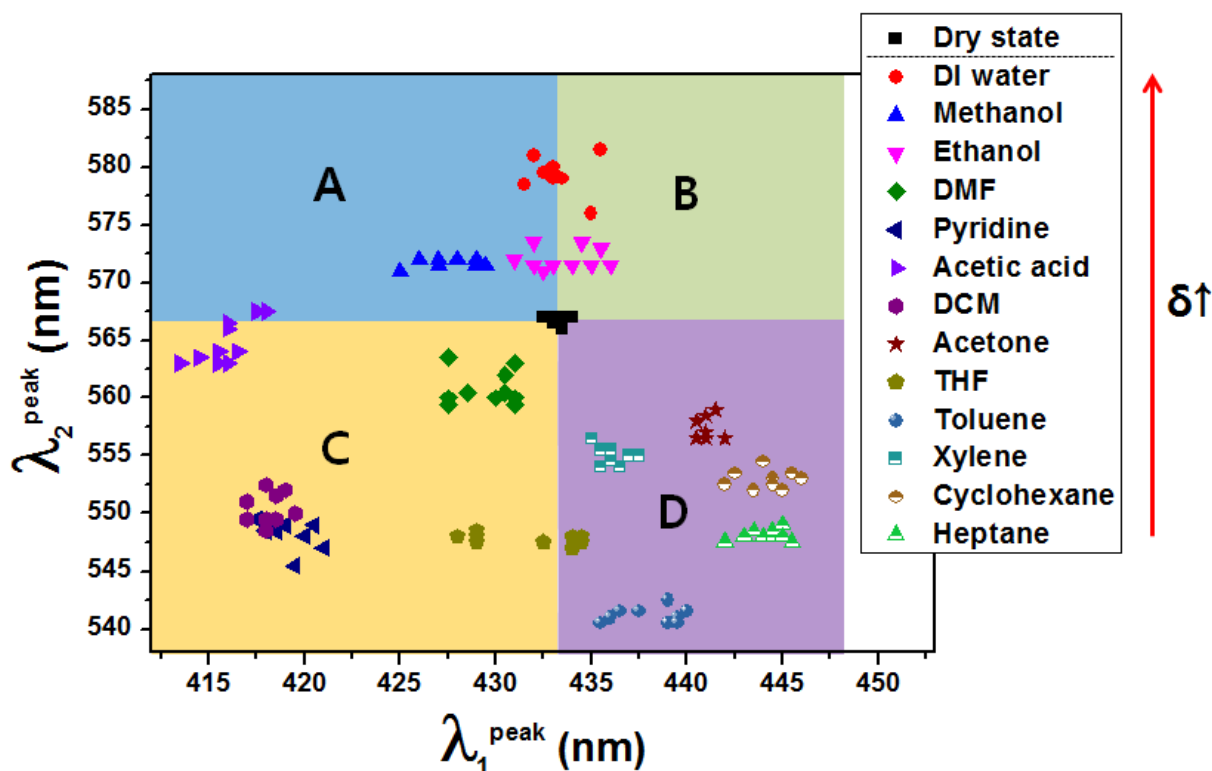

**Figure S3.** Classification of liquids depending on the type of peak shift. (Reference: dry state) The stretching of polymer brushes results in a negative shift, while the compression of chains combined with the effect of a liquid's refractive index induces a positive shift. (+) and (−) indicate positive and negative shifts, respectively.  $\delta$  indicates the solubility parameter of a liquid.

**A:**  $\lambda_1^{\text{peak}}$  (−) and  $\lambda_2^{\text{peak}}$  (+), **B:**  $\lambda_1^{\text{peak}}$  (+) and  $\lambda_2^{\text{peak}}$  (+), **C:**  $\lambda_1^{\text{peak}}$  (−) and  $\lambda_2^{\text{peak}}$  (−), **D:**  $\lambda_1^{\text{peak}}$  (+) and  $\lambda_2^{\text{peak}}$  (−)
